# Supplementary material for: The White Collar Complex Is Involved in Sexual Development of Fusarium graminearum
Source: PubMed Central journal article supplement (PMC4364711; doi:10.1371/journal.pone.0120293), 2015-03-18
Supplement: pone.0120293.s007.pdf [file pone.0120293.s007.pdf]

**Table S1.** Primers used in this study

| Primer     | Sequence(5' → 3')                                      | Description                                                                                                                                        |
|------------|--------------------------------------------------------|----------------------------------------------------------------------------------------------------------------------------------------------------|
| Fgwc1-5F   | TGCTCCTCATCATTTTGAATAATCA                              | Forward and reverse primers for amplification of the 5'-flanking region of <i>FgWc-1</i> with a tail for geneticin resistance gene cassette fusion |
| Fgwc1-5R   | <b>gcacaggtacacttggttagag</b> AAGATGTTGAGCGGGTGTAT     |                                                                                                                                                    |
| Fgwc1-3F   | <b>ccttcaatatcatcttctgtcg</b> GCGGCTTAGGGCTCAGA        | Forward and reverse primers for amplification of the 3'-flanking region of <i>FgWc-1</i> with a tail for geneticin resistance gene cassette fusion |
| Fgwc1-3R   | CCGATAATGCAGCAATACTACAGT                               |                                                                                                                                                    |
| Fgwc1-5N   | GTTGTGGCGATTATTTTTATCAATGTAC                           | Forward and reverse nest primers for third fusion PCR for amplification of the <i>FgWc-1</i> deletion construct                                    |
| Fgwc1-3N   | CGCATATCGTCGGGAATCGTTTAG                               |                                                                                                                                                    |
| Fgwc2-5F   | TCGAATGGGTAGACTGAGGAC                                  | Forward and reverse primers for amplification of the 5'-flanking region of <i>FgWc-2</i> with a tail for geneticin resistance gene cassette fusion |
| Fgwc2-5R   | <b>gcacaggtacacttggttagag</b> GTGGCAGCGACAACGATAGGAG   |                                                                                                                                                    |
| Fgwc2-3F   | <b>ccttcaatatcatcttctgtcg</b> ATGGCGCGATACGGCAGGATTC   | Forward and reverse primers for amplification of the 3'-flanking region of <i>FgWc-2</i> with a tail for geneticin resistance gene cassette fusion |
| Fgwc2-3R   | GCGTTGATGAGCTTATCCAT                                   |                                                                                                                                                    |
| Fgwc2-5N   | TGAGGCACCATCATGACAAGTATTC                              | Forward and reverse nest primers for third fusion PCR for amplification of the <i>FgWc-2</i> deletion construct                                    |
| Fgwc2-3N   | CTGCGCCTATTGTCTCAAGTACATCA                             |                                                                                                                                                    |
| FgFphA-5F  | CGACGCAGACACAGAAACTGA                                  | Forward and reverse primers for amplification of the 5'-flanking region of <i>FgFph</i> with a tail for geneticin resistance gene cassette fusion  |
| FgFphA-5R  | <b>gcacaggtacacttggttagag</b> CTTGGTCGCGGTCTAGAGTAAT   |                                                                                                                                                    |
| FgFphA-3F  | <b>ccttcaatatcatcttctgtcg</b> CCGACTATTTTCTTTGATTTTCTG | Forward and reverse primers for amplification of the 3'-flanking region of <i>FgFph</i> with a tail for geneticin resistance gene cassette fusion  |
| FgFphA-3R  | AGGGGAGCCTAGGAAACAAAT                                  |                                                                                                                                                    |
| FgFphA-5N  | CCGGTACTCCAGTGCTGACATT                                 | Forward and reverse nest primers for third fusion PCR for amplification of the <i>FgFph</i> deletion construct                                     |
| FgFphA-3N  | GCGTTGAACGTTTCGAGGTAGGC                                |                                                                                                                                                    |
| Gen-F      | CGACAGAAGATGATATTGAAGG                                 | Forward and reverse nest primers for amplification of the geneticin cassette from the pII99 vector                                                 |
| Gen-R      | CTCTAAACAAGTGACCTGTG                                   |                                                                                                                                                    |
| Fgwc1-rev5 | GGCGACAGCATCTGGCTGGA                                   | Reverse primers for amplification of the 5'-flanking region of <i>FgWc-1</i>                                                                       |
| AnLreA-F   | <b>tccagccagatgctgtcgcc</b> ATGGCCAATCGAGATATCAACGA    | Forward and reverse primers for amplification of whole <i>LreA</i> gene                                                                            |
| AnLreA-R   | <b>aatgaatcacgcccaacgc</b> TCAACCCTCACCGCCAGACTTTG     |                                                                                                                                                    |
| Fgwc1-for3 | GCGTTGGGCGTGATTCATT                                    | Forward primer for amplification of the 3'-flanking region of <i>FgWc-1</i>                                                                        |
| Fgwc2-rev5 | GGTTATCAAGGTTACGTTTGCG                                 | reverse primers for amplification of the 5'-flanking region of <i>FgWc-2</i>                                                                       |
| AnLreB-F   | <b>caaacgtaacctgataacc</b> ATGGATCCCACCCACCTCCAACATA   | Forward and reverse primers for amplification of whole <i>LreB</i> gene                                                                            |
| AnLreB-R   | <b>gcacatttgcgactgtcgagt</b> TCATAAGCCCGAATCTTGCCGTT   |                                                                                                                                                    |
| Fgwc2-for3 | ACTCGACAGTCGCAAATGTGCCAA                               | Forward primer for amplification of the 3'-flanking region of <i>FgWc-2</i>                                                                        |
| Gen-RevN   | CCGCTTGGGTGGAGAGGCTATT                                 | Screening primer for deletion mutants                                                                                                              |
| Gen-ForN   | <b>CCACAGTCGATGAATCCAGAAAAG</b>                        |                                                                                                                                                    |
| Fgwc1-SF   | <b>GTGCAAACCTGCCATAACAAGGAACA</b>                      | Forward and reverse primers for amplification of ~ 0.2 kb region of <i>FgWc-1</i>                                                                  |
| Fgwc1-SR   | ATGTAATGGCGACGAGGGAGAAT                                |                                                                                                                                                    |
| Fgwc2-SF   | AGACCCACGAACAGGCGATAA                                  | Forward and reverse primers for amplification of ~ 0.2 kb region of <i>FgWc-2</i>                                                                  |
| Fgwc2-SR   | GTGGCTAGTGGTCTCTTCTTCTCC                               |                                                                                                                                                    |

|              |                                                  |                                                                                               |
|--------------|--------------------------------------------------|-----------------------------------------------------------------------------------------------|
| FgFphA-SF    | AGGAGAGTATTGAGACGCTTGAAGTC                       | Forward and reverse primers for amplification of ~ 0.2 kb region of <i>FgFph</i>              |
| FgFphA-SR    | GCGAGTTCGACGTTGTTCTGATG                          |                                                                                               |
| AnLreA-SF    | CGCAATTGTCGCTTCCTTCAGAG                          | Forward and reverse primers for amplification of ~ 0.2 kb region of <i>LreA</i>               |
| AnLreA-SR    | GCGCACCGGGATCATCGTCACCA                          |                                                                                               |
| AnLreB-SF    | TCAGTGCAGACGGAGTAGTTCATT                         | Forward and reverse primers for amplification of ~ 0.2 kb region of <i>LreB</i>               |
| AnLreB-SR    | CCTGGTACATCCGGAAGTGACAAT                         |                                                                                               |
| EF1-PS1      | GGCTTTCACCGACTACCCTCCTCT                         | Forward and reverse primers for qRT-PCR of <i>EF1</i> gene                                    |
| EF1-PS2      | ACTTCTCGACGGCCTTGATGACAC                         |                                                                                               |
| clucWC1for   | <b>gtccccggggtacc</b> GATGGCTTCTACTCCCCCAT       | Forward and reverse primers for amplification of <i>FgWc-1</i> , which was cloned into pFCLuc |
| clucWC1rev   | <b>tggatccccgggtacc</b> TCAAGATTGGCTTGTCTCGCG    |                                                                                               |
| nlucWC2for   | <b>acgagatctggtcgac</b> ATGTCTCACGGACCTCCTCCGCC  | Forward and reverse primers for amplification of <i>FgWc-2</i> , which was cloned into pFNLuc |
| nlucWC2rev   | <b>agctcgagtagtcgac</b> GGCGACCGATTGATCCACTGTCTG |                                                                                               |
| nlucFphAfor  | <b>acgagatctggtcgac</b> ATGAGCCACTCCTATCTGC      | Forward and reverse primers for amplification of <i>FgFph</i> , which was cloned into pFNLuc  |
| nlucFphArev  | <b>agctcgagtagtcgac</b> GTCATTGTCGGGCTTGGCTT     |                                                                                               |
| clucFphA/for | <b>gtccccggggtacc</b> AGCCACTCCTATCTGCGAG        | Forward and reverse primers for amplification of <i>FgFph</i> , which was cloned into pFCLuc  |
| clucFphA/rev | <b>tggatccccgggtacc</b> TCAGTCATTGTCGGGCTTGG     |                                                                                               |
